# Supplementary material for: Toward real-time monitoring of lithium metal growth and dendrite formation surveillance for safe lithium metal batteries
Source: Royal Society of Chemistry journal article supplement (doi:10.1039/d0ta01525c), 2020-01-01
Supplement: d0ta01525c1.pdf [file d0ta01525c1.pdf]

## Supporting Information

### **Toward Real-time Monitoring Lithium Metal Growth and Early Dendrite Formation Surveillance for Safe Lithium Metal Batteries**

Houchao Zhan,<sup>a, b</sup> Peichao Zou,<sup>\*a, c</sup> Wentao Yao,<sup>a</sup> Long Qian,<sup>a, b</sup> Kangwei Liu,<sup>a, b</sup>  
Shengyu Hu,<sup>a</sup> Haojie Zhu,<sup>a</sup> Yanbing He,<sup>a</sup> Feiyu Kang,<sup>a, b</sup> Cheng Yang<sup>\*a</sup>

<sup>a</sup> Division of Energy and Environment, Tsinghua Shenzhen International Graduate School, 518055, China.

<sup>b</sup> School of Materials Science and Engineering, Tsinghua University, Beijing, 100084, China.

<sup>c</sup> Department of Physics and Astronomy, University of California, Irvine, 92697, United States.

\*Corresponding authors: [yang.cheng@sz.tsinghua.edu.cn](mailto:yang.cheng@sz.tsinghua.edu.cn), [zoupc2019@163.com](mailto:zoupc2019@163.com)

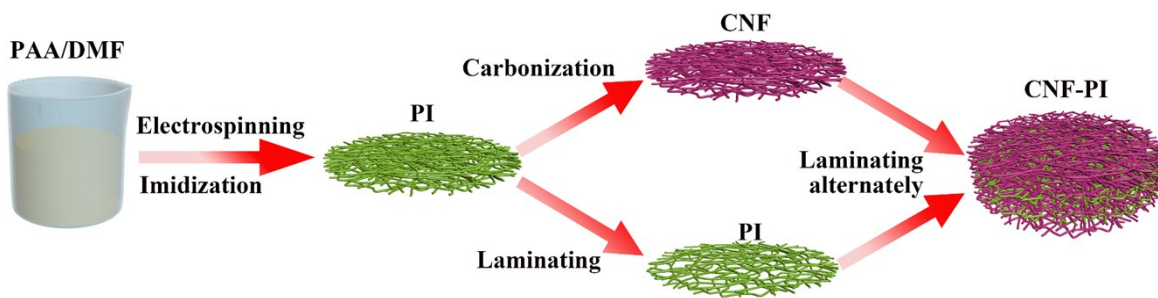

**Fig. S1.** Schematic diagram of the fabrication process of the CNF-PI host.

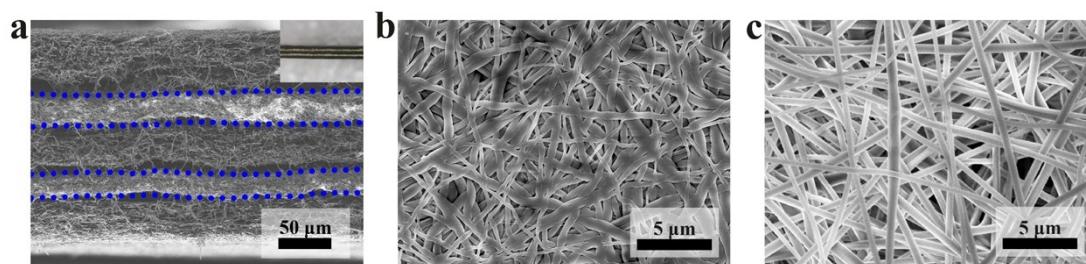

**Fig. S2.** SEM images of (a) Cross-sectional SEM image of CNF-PI 3D host, (b) PI films after laminating and (c) CNF scaffold. Inset panel in (a) is digital photograph of CNF-PI.

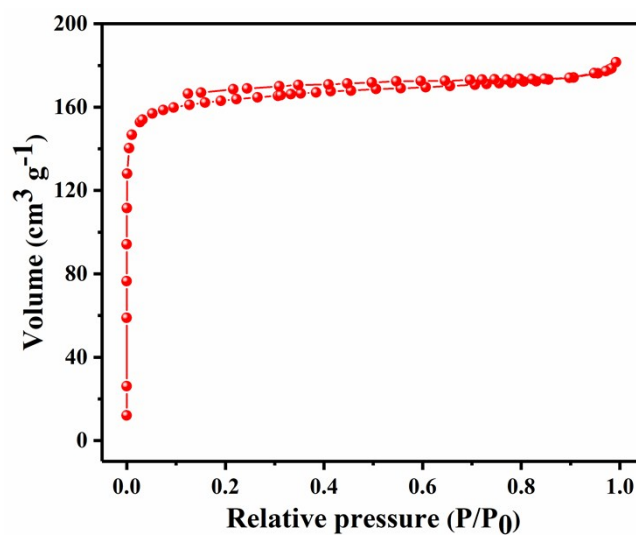

**Fig. S3.** Nitrogen adsorption-desorption isotherm of CNF.

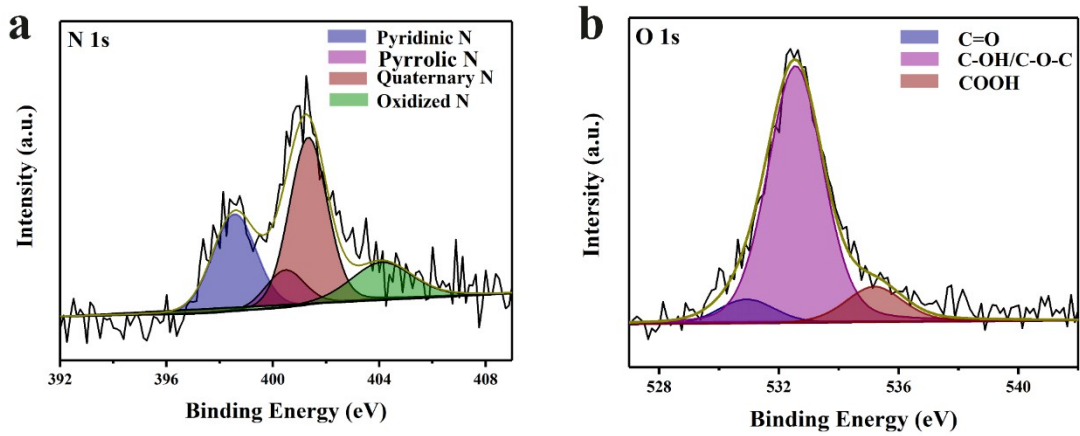

**Fig. S4.** (a) N 1s and (b) O 1s high-resolution XPS spectra for CNF.

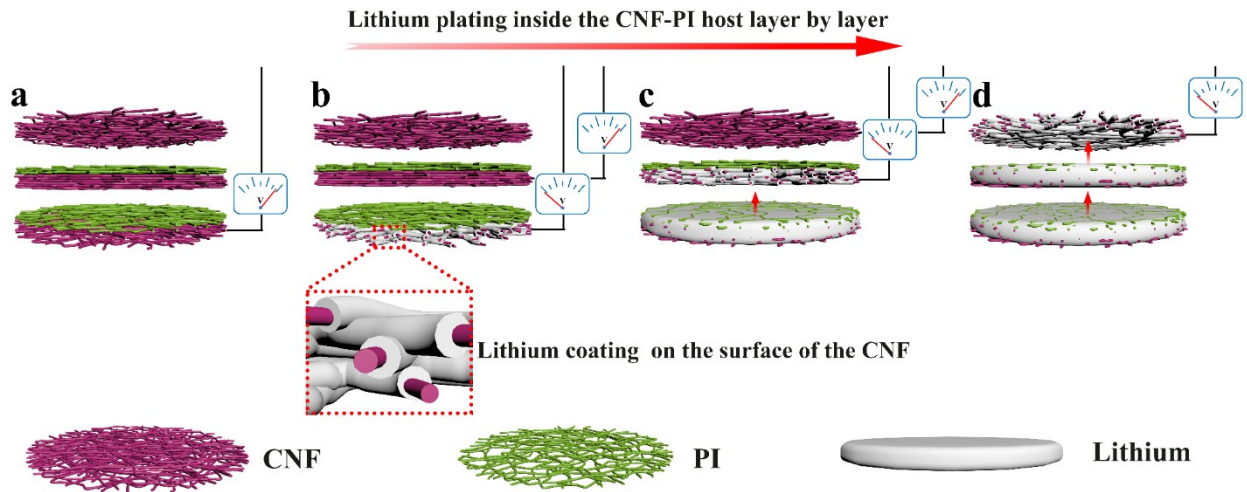

**Fig. S5.** Schematic illustration of the lithium plating process inside the CNF-PI host. Lithium metal grow in a stepwise “bottom-up” manner due to the block of the electronic transport path.

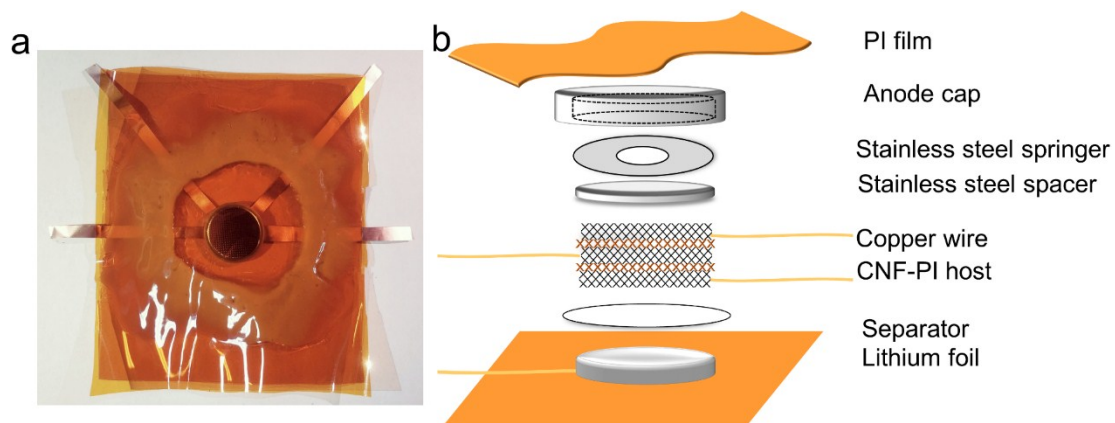

**Fig. S6.** (a) Digital photos of the voltage monitoring cell and (b) the schematic illustration of its inside structure. Three copper wire terminals link separately three layers of CNF in the CNF-PI host to monitor the voltage. The anode cap and stainless-steel springer/spacer are assembled to fix the cell and release the packaging stress.

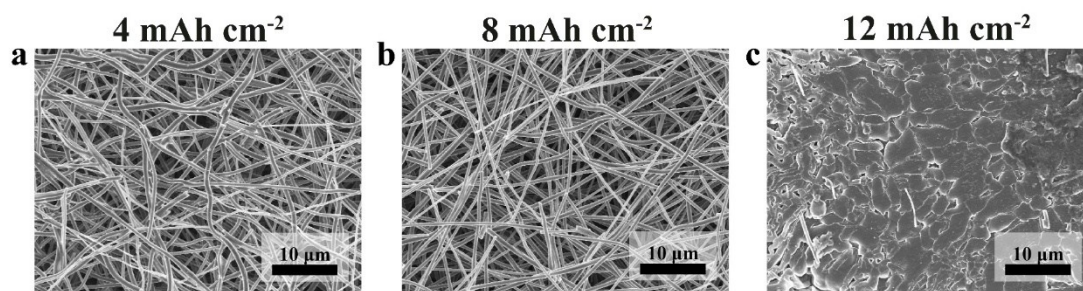

**Fig. S7.** (a-c) SEM images of the CNF-PI host when (a)  $4 \text{ mAh cm}^{-2}$ , (b)  $8 \text{ mAh cm}^{-2}$ , (c)  $12 \text{ mAh cm}^{-2}$  lithium was plated in. Only carbon nanofibers are observed on the surface until the lithium deposition capacity increasing to  $12 \text{ mAh cm}^{-2}$ .

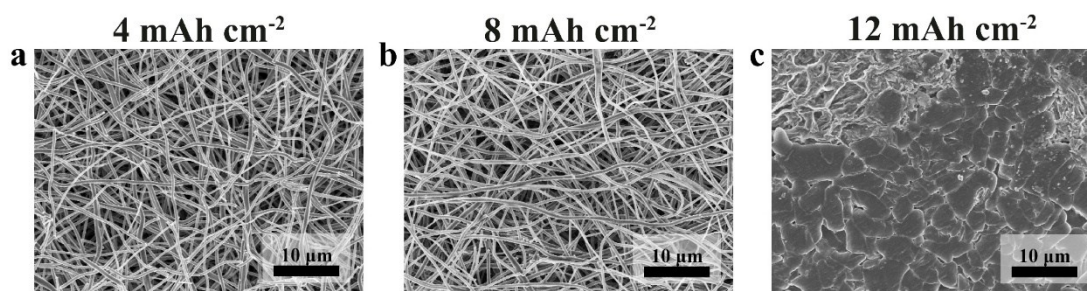

**Fig. S8.** (a-c) SEM images of lithium depositing inside the CNF-PI host after 10 cycles at  $1 \text{ mA cm}^{-2}$  and (b)  $4 \text{ mAh cm}^{-2}$ , (b)  $8 \text{ mAh cm}^{-2}$ , (c)  $12 \text{ mAh cm}^{-2}$ .



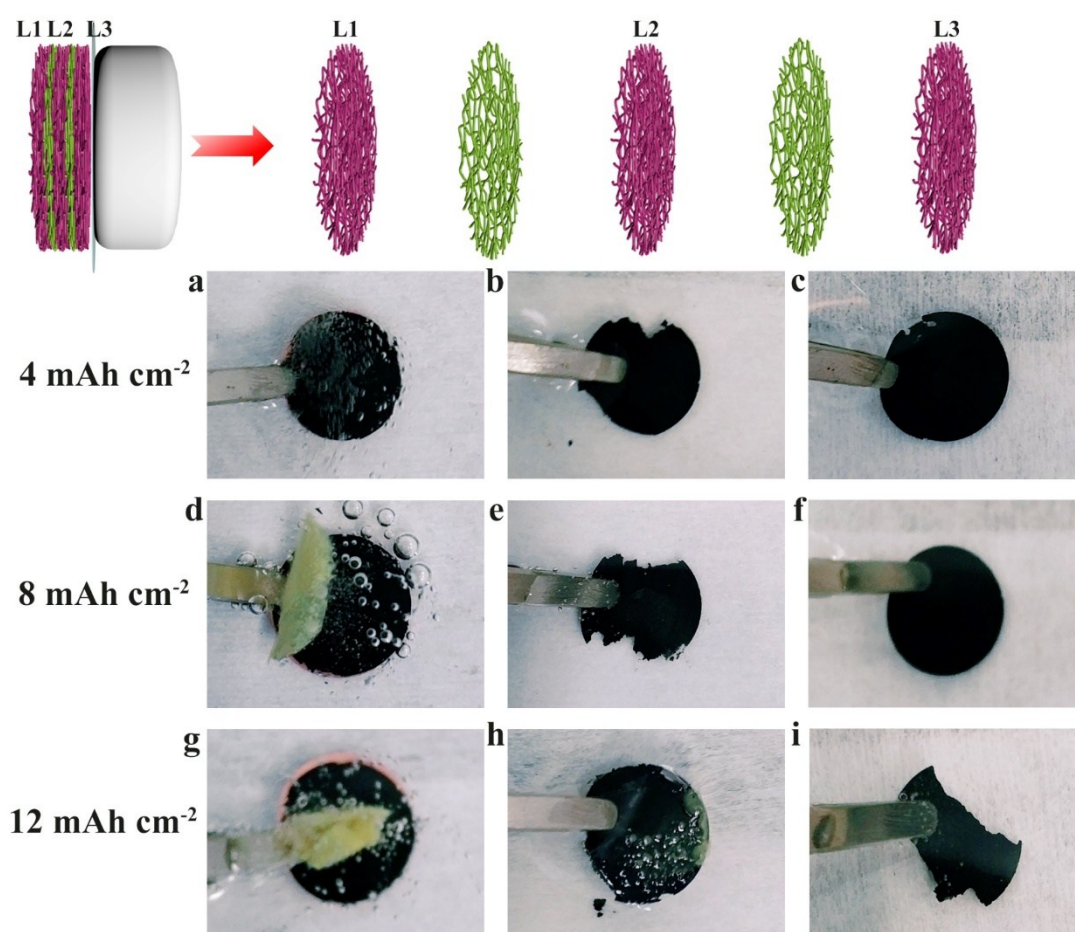

**Fig. S9.** CNF-PI host with (a, b, c)  $4 \text{ mAh cm}^{-2}$ , (d, e, f)  $8 \text{ mAh cm}^{-2}$ , (a, h, i)  $12 \text{ mAh cm}^{-2}$  lithium deposition was separated, and the (a, d, g) bottom, (b, e, h) intermediate, (c, f, i) top layer of CNF was dipped in water-alcohol mix solution. Bubbles generating at different lithium plating capacity confirm the stepwise deposition of lithium metal layer by layer inside the CNF-PI framework and the change in the monitoring voltage of the conductive layer reflecting the location of the lithium metal.

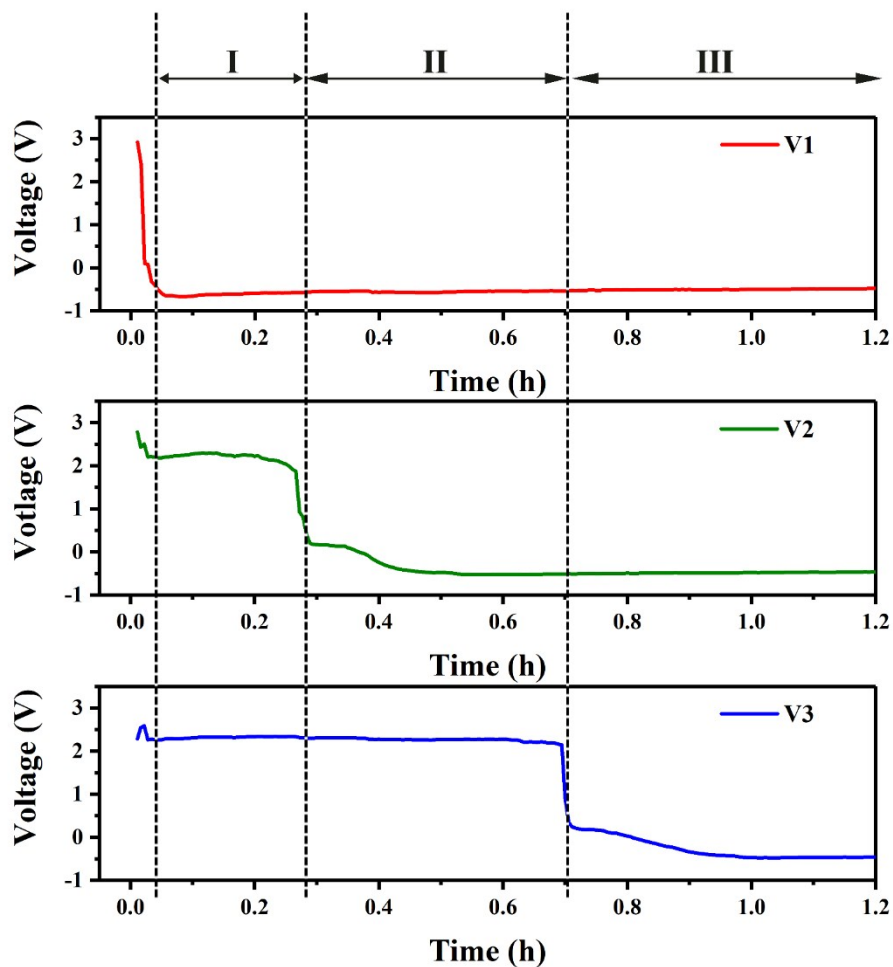

**Fig. S10.** Voltage profile of three layers of CNF monitoring voltage V1, V2 and V3 when a current of  $10 \text{ mA cm}^{-2}$  was applied.

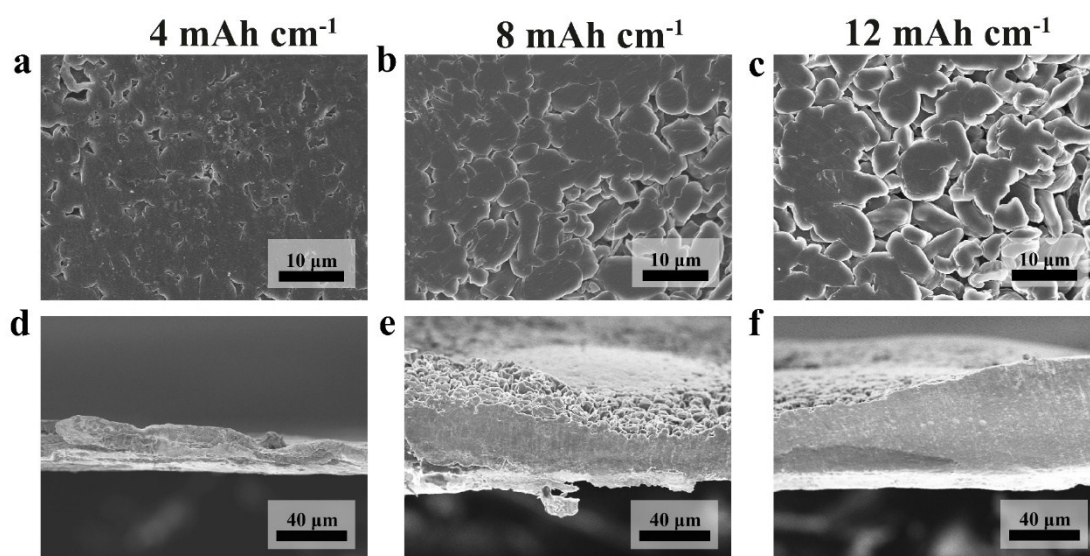

**Fig. S11.** (a-c) SEM images of lithium depositing on the Cu host when (a)  $4 \text{ mAh cm}^{-2}$ , (b)  $8 \text{ mAh cm}^{-2}$ , (c)  $12 \text{ mAh cm}^{-2}$  lithium was plated in. (d-f) Cross-sectional SEM images of lithium depositing on the Cu host when (d)  $4 \text{ mAh cm}^{-2}$ , (e)  $8 \text{ mAh cm}^{-2}$ , (f)  $12 \text{ mAh cm}^{-2}$  lithium was plated in.

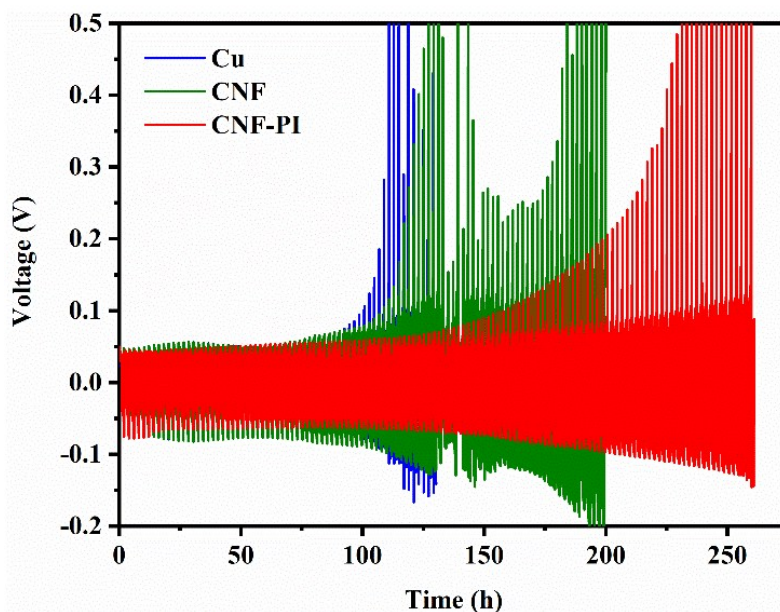

**Fig. S12.** Voltage-time profile of the half cells (Cu||Li, CNF||Li, CNF-PI||Li) at 3 mA cm<sup>-2</sup>, 3 mAh cm<sup>-2</sup>.

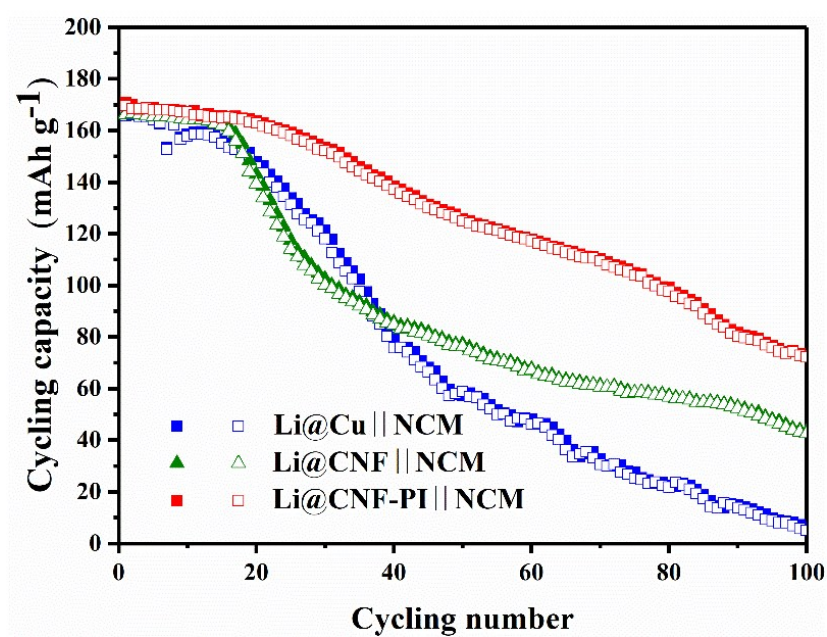

**Fig. S13.** Cycle performance of the full cell at 1 C (200 mA g<sup>-2</sup>) with 5 mAh cm<sup>-2</sup> lithium inserted.

**Table S1.** Comparison of Li plating/stripping CE of various hosts

|                                       | Host Materials                          | Host Thickness ( $\mu\text{m}$ ) | Electrolyte                                      | Cycling Capacity ( $\text{mAh cm}^{-2}$ ) | Current Densities ( $\text{mA cm}^{-2}$ ) | Coulombic Efficiency | Cycles |
|---------------------------------------|-----------------------------------------|----------------------------------|--------------------------------------------------|-------------------------------------------|-------------------------------------------|----------------------|--------|
| This work                             | CNF-PI                                  | 160                              | 1 M LiPF <sub>6</sub> in EC/DEC/DMEC + 10.0% FEC | 3                                         | 1                                         | 97.5%                | 140    |
|                                       |                                         |                                  |                                                  | 3                                         | 3                                         | 96.2%                | 90     |
|                                       |                                         |                                  |                                                  | 5                                         | 3                                         | 96.6%                | 60     |
|                                       |                                         |                                  |                                                  | 10                                        | 5                                         | 96.5%                | 30     |
| 2017. Adv. Mater. <sup>1</sup>        | Graphitized carbon fibers               | 1000                             | 1 M LiTFSI in DOL/DME + 1% LiNO <sub>3</sub>     | 8                                         | 0.5                                       | ~98%                 | 70     |
| 2017. Joule. <sup>2</sup>             | Hollow carbon fiber                     | 165                              | 1 M LiTFSI in DOL/DME + 1% LiNO <sub>3</sub>     | 2                                         | 1                                         | 99.5%                | 240    |
| 2018. Adv. Energy Mater. <sup>3</sup> | N-doped graphene modified 3D porous Cu  | 70                               | 1 M LiTFSI in DOL/DME + 1% LiNO <sub>3</sub>     | 2                                         | 1                                         | 97%                  | 50     |
| 2018. Adv. Energy Mater. <sup>4</sup> | Porous poly-melamine-formaldehyde (PMF) | ~200                             | 1 M LiTFSI in DOL/DME                            | 3                                         | 1                                         | 97.5                 | 120    |
| 2018. Adv. Mater. <sup>5</sup>        | Carbon nanotube                         | ~80                              | 1 M LiTFSI in DOL/DME                            | 5                                         | 1                                         | 97.5                 | 100    |
| 2018. Adv. Mater. <sup>6</sup>        | Cu-CuO-Ni                               | ~200                             | 1 M LiTFSI in DOL/DME + 1% LiNO <sub>3</sub>     | 1                                         | 1                                         | 95%                  | 250    |
| 2019. ESM. <sup>7</sup>               | Gold nanoparticle-modified carbon paper | 137.1                            | 1 M LiTFSI in DOL/DME + 1% LiNO <sub>3</sub>     | 1                                         | 2                                         | 97.6%                | 100    |
| 2019. Adv. Mater. <sup>8</sup>        | Cu nanowire                             | 36.6                             | 1 M LiTFSI in DOL/DME + 1% LiNO <sub>3</sub>     | 3                                         | 1                                         | 97.5%                | 60     |
| 2019. Nat. Comm. <sup>9</sup>         | Al <sub>2</sub> O <sub>3</sub> -Ni-Au   | 70                               | 1 M LiTFSI in DOL/DME + 1% LiNO <sub>3</sub>     | 2                                         | 0.5                                       | 97 %                 | 350    |

### Supplementary References



1. T. T. Zuo, X. W. Wu, C. P. Yang, Y. X. Yin, H. Ye, N. W. Li and Y. G. Guo, *Advanced materials*, 2017, **29**.
2. L. Liu, Y.-X. Yin, J.-Y. Li, N.-W. Li, X.-X. Zeng, H. Ye, Y.-G. Guo and L.-J. Wan, *Joule*, 2017, **1**, 563-575.
3. R. Zhang, S. Wen, N. Wang, K. Qin, E. Liu, C. Shi and N. Zhao, *Advanced Energy Materials*, 2018, **8**, 1800914.
4. L. Fan, H. L. Zhuang, W. Zhang, Y. Fu, Z. Liao and Y. Lu, *Advanced Energy Materials*, 2018, **8**, 1703360.
5. Z. Sun, S. Jin, H. Jin, Z. Du, Y. Zhu, A. Cao, H. Ji and L. J. Wan, *Advanced materials*, 2018, **30**, e1800884.
6. S. Wu, Z. Zhang, M. Lan, S. Yang, J. Cheng, J. Cai, J. Shen, Y. Zhu, K. Zhang and W. Zhang, *Advanced materials*, 2018, **30**.
7. B. Hong, H. Fan, X.-B. Cheng, X. Yan, S. Hong, Q. Dong, C. Gao, Z. Zhang, Y. Lai and Q. Zhang, *Energy Storage Materials*, 2019, **16**, 259-266.
8. C. Zhang, R. Lyu, W. Lv, H. Li, W. Jiang, J. Li, S. Gu, G. Zhou, Z. Huang, Y. Zhang, J. Wu, Q. H. Yang and F. Kang, *Advanced materials*, 2019, DOI: 10.1002/adma.201904991, e1904991.
9. J. Pu, J. Li, K. Zhang, T. Zhang, C. Li, H. Ma, J. Zhu, P. V. Braun, J. Lu and H. Zhang, *Nature communications*, 2019, **10**, 1896.
